# Supplementary material for: Deep sequencing reveals clonal evolution patterns and mutation events associated with relapse in B-cell lymphomas
Source: PubMed Central journal article supplement (PMC4158101; doi:10.1186/s13059-014-0432-0), 2014-08-15
Supplement: 13059_2014_432_MOESM1_ESM.pdf [file 13059_2014_432_MOESM1_ESM.pdf]

| Pair # | Sam-ple ID | Diagnosis /Relapse | Date       | Age /Sex | Disease                                 | DLBCL GCB/non-GCB subtype (if applicable) | Location                            |
|--------|------------|--------------------|------------|----------|-----------------------------------------|-------------------------------------------|-------------------------------------|
| 1      | 1D         | Diagnosis          | 9.9.1999   | 74M      | DLBCL                                   | ND                                        | Nasal septum                        |
|        | 1R1        | Relapse            | 1.5.2006   | 81M      | DLBCL                                   | Non-GCB                                   | Right arm                           |
|        | 1R2        | Relapse            | 1.5.2006   | 81M      | DLBCL                                   | Non-GCB                                   | Right leg                           |
|        | 1R3        | Relapse            | 1.5.2006   | 81M      | DLBCL                                   | Non-GCB                                   | Right nose                          |
| 2      | 2D         | Diagnosis          | 11.10.2004 | 57F      | DLBCL                                   | Non-GCB                                   | Left inguinal lymph node            |
|        | 2R1        | Relapse            | 7.7.2006   | 58F      | Low grade B cell lymphoma               |                                           | Thigh mass                          |
|        | 2R2        | Relapse            | 11.12.2007 | 60F      | DLBCL                                   | Non-GCB                                   | Right soft palate mass              |
| 3      | 3D1        | Diagnosis          | 3.23.3007  | 54M      | DLBCL (transformed from CLL)            | Non-GCB                                   | Right neck lymph node               |
|        | 3R2        | Relapse            | 11.22.2008 | 56M      | DLBCL (transformed from CLL)            | GCB                                       | Left submandibular mass             |
| 4      | 4D         | Diagnosis          | 11.2.2007  | 28F      | DLBCL                                   | Non-GCB                                   | Right cervical lymph node           |
|        | 4PR        | Progression        | 4.18.2008  | 28F      | DLBCL                                   | Non-GCB                                   | Mediastinum                         |
| 5      | 9D         | Diagnosis          | 7.30.2008  | 50M      | DLBCL (THRLBCL)                         |                                           | Left axillary lymph node            |
|        | 9R         | Relapse            | 6.16.2011  | 53M      | DLBCL (THRLBCL)                         |                                           | Left axillary lymph node            |
| 6      | 12D        | Diagnosis          | 11.18.1997 | 61F      | DLBCL                                   | Non-GCB                                   | Left axillary lymph node            |
|        | 12R        | Relapse            | 3.25.1999  | 63F      | DLBCL                                   | Non-GCB                                   | Right posterior triangle lymph node |
| 7      | 13D1       | Diagnosis          | 1.31.1995  | 50F      | FL, low grade                           |                                           | Right cervical lymph node           |
|        | 13D2       | Diagnosis          | 11.9.1999  | 55F      | DLBCL (with FL)                         | GCB                                       | Right cervical lymph node           |
|        | 13R        | Relapse            | 10.1.2001  | 57F      | DLBCL                                   | GCB                                       | Retroperitoneal lymph node          |
| 8      | 14D        | Diagnosis          | 6.21.1996  | 64M      | DLBCL                                   | GCB                                       | Left neck mass                      |
|        | 14R        | Relapse            | 3.6.2007   | 75M      | DLBCL                                   | GCB                                       | Right colon                         |
| 9      | 15D1       | Diagnosis          | 5.21.1995  | 73M      | FL, grade 2                             |                                           | Right inguinal lymph node           |
|        | 15D2       | Diagnosis          | 7.18.2002  | 80M      | DLBCL (FL transformation)               | GCB                                       | Submental mass                      |
|        | 15R        | Relapse            | 8.8.2008   | 86M      | DLBCL                                   | GCB                                       | Sternal mass                        |
| 10     | 16D        | Diagnosis          | 7.28.2000  | 36M      | DLBCL (>90%), FL grade 3 (<10%)         | GCB                                       | Mesenteric lymph node               |
|        | 16R        | Relapse            | 4.17.2001  | 37M      | DLBCL                                   | GCB                                       | Retroperitoneal lymph node          |
| 11     | F6D        | Diagnosis          | 1.21.2010  | 54M      | DLBCL (history of FL, treated, dx free) | GCB                                       | Left axillary lymph node            |
|        | F6PR       | Progression        | 3.31.2011  | 56M      | DLBCL                                   | GCB                                       | Left axillary lymph node            |
| 12     | F7D        | Diagnosis          | 7.7.2005   | 72F      | DLBCL                                   | Non-GCB                                   | Right neck mass                     |
|        | F7R        | Relapse            | 10.11.2010 | 77F      | DLBCL                                   | Non-GCB                                   | Abdominal Wall                      |
| 13     | SPF6-1     | Diagnosis          | 1.29.2010  | 80M      | DLBCL transformed from SLL              | Non-GCB                                   | Right iliac abdominal wall          |
|        | SPF6-2     | Diagnosis          | 1.29.2010  | 80M      | DLBCL transformed from SLL              | Non-GCB                                   | Right iliac abdominal wall          |
|        | SPF6-3     | Relapse            | 8.13.2010  | 80M      | DLBCL                                   | Non-GCB                                   | R calf skin/subcutis                |
| 14     | SPF10-1    | Diagnosis          | 1.7.2011   | 59F      | DLBCL                                   | Non-GCB                                   | Right inguinal LN                   |
|        | SPF10-2    | Relapse            | 1.20.2012  | 60F      | DLBCL                                   | Non-GCB                                   | Left axillary LN                    |

Table S1. Sample information
