# Supplementary material for: Deep sequencing reveals clonal evolution patterns and mutation events associated with relapse in B-cell lymphomas
Source: PubMed Central journal article supplement (PMC4158101; doi:10.1186/s13059-014-0432-0), 2014-08-15
Supplement: 13059_2014_432_MOESM2_ESM.pdf [file 13059_2014_432_MOESM2_ESM.pdf]

Table S2: Summary of sequencing run metrics.

|    | Sample ID | IGH/IGK Sequencing (PE150) |                       |                               | Exome Sequencing (PE75)                  |                      |                         |
|----|-----------|----------------------------|-----------------------|-------------------------------|------------------------------------------|----------------------|-------------------------|
|    |           | Amplicon Region            | Total Number of Reads | Total Number of Aligned Reads | Total Number of Non-clonal Aligned Reads | Percentage on Target | Percentage 20X Coverage |
| 1  | 1D        | IGH-FR1                    | 658935                | 451518                        | 75415072                                 | 84.08%               | 80.90%                  |
|    | 1R1       | IGH-FR1                    | 708183                | 525808                        | 96805731                                 | 83.92%               | 84.10%                  |
|    | 1R2       | N.A.                       | N.A.                  | N.A.                          | 84294868                                 | 75.24%               | 80.22%                  |
|    | 1R3       | IGH-FR1                    | 763459                | 597531                        | 93089979                                 | 81.18%               | 82.65%                  |
| 2  | 2D        | IGH-FR1                    | 589297                | 437392                        | 63472879                                 | 82.78%               | 77.14%                  |
|    | 2R1       | IGH-FR1                    | 549376                | 430628                        | 94189631                                 | 84.81%               | 83.56%                  |
|    | 2R2       | N.A.                       | N.A.                  | N.A.                          | N.A.                                     | N.A.                 | N.A.                    |
|    | 2C        | N.A.                       | N.A.                  | N.A.                          | 43653236                                 | 57.20%               | 82.10% (4X)             |
| 3  | 3D1       | IGH-FR1                    | 692794                | 516897                        | 132967447                                | 80.70%               | 89.28%                  |
|    | 3R2       | IGH-FR1                    | 819851                | 579717                        | 127361118                                | 79.88%               | 88.82%                  |
|    | 3C        | N.A.                       | N.A.                  | N.A.                          | 58384130                                 | 46.09%               | 86.71% (4X)             |
| 4  | 4D        | IGH-FR1                    | 517157                | 396865                        | N.A.                                     | N.A.                 | N.A.                    |
|    | 4PR       | IGH-FR1                    | 517035                | 411699                        | N.A.                                     | N.A.                 | N.A.                    |
| 5  | 9D        | IGH-FR1                    | 1278068               | 681471                        | N.A.                                     | N.A.                 | N.A.                    |
|    | 9R        | IGH-FR2                    | 1422766               | 726322                        | N.A.                                     | N.A.                 | N.A.                    |
| 6  | 12D       | IGH-FR1                    | 462731                | 342178                        | 38723807                                 | 85.01%               | 56.72%                  |
|    | 12R       | IGH-FR1                    | 842693                | 529538                        | 56060128                                 | 84.46%               | 76.99%                  |
| 7  | 13D1      | IGH-FR2                    | 387562                | 292747                        | 64316900                                 | 85.42%               | 76.93%                  |
|    | 13D2      | IGH-FR2                    | 445859                | 366262                        | 85243729                                 | 83.65%               | 84.45%                  |
|    | 13R       | IGH-FR2                    | 511206                | 324770                        | 61260464                                 | 82.13%               | 80.75%                  |
|    | 13C       | N.A.                       | N.A.                  | N.A.                          | 245300326                                | 46.33%               | 83.20%                  |
| 8  | 14D       | IGH-FR1                    | 705739                | 345771                        | 136509061                                | 79.71%               | 89.37%                  |
|    | 14R       | IGH-FR1                    | 693319                | 314207                        | 122599476                                | 79.92%               | 88.63%                  |
| 9  | 15D1      | IGH-FR2                    | 1099201               | 564247                        | 61209460                                 | 84.42%               | 74.53%                  |
|    | 15D2      | IGH-FR1                    | 671277                | 337439                        | N.A.                                     | N.A.                 | N.A.                    |
|    | 15R       | IGH-FR1                    | 994540                | 280229                        | 52434414                                 | 83.66%               | 78.86%                  |
| 10 | 16D       | IGH-FR2                    | 1205029               | 933788                        | N.A.                                     | N.A.                 | N.A.                    |
|    | 16R       | IGH-FR1                    | 1151546               | 700939                        | N.A.                                     | N.A.                 | N.A.                    |
| 11 | F6D       | IGH-FR1                    | 1022621               | 752282                        | N.A.                                     | N.A.                 | N.A.                    |
|    | F6R1      | IGH-FR1                    | 674704                | 529241                        | N.A.                                     | N.A.                 | N.A.                    |
| 12 | F7D       | IGH-FR1                    | 678097                | 575520                        | N.A.                                     | N.A.                 | N.A.                    |
|    | F7R       | IGH-FR1                    | 978152                | 419368                        | N.A.                                     | N.A.                 | N.A.                    |
| 13 | SPF6-1    | IGH-FR2                    | 639113                | 481941                        | N.A.                                     | N.A.                 | N.A.                    |
|    | SPF6-2    | IGH-FR2                    | 586490                | 473088                        | N.A.                                     | N.A.                 | N.A.                    |
|    | SPF6-3    | IGH-FR2                    | 608807                | 468235                        | N.A.                                     | N.A.                 | N.A.                    |
| 14 | SPF10-1   | IGH-FR2                    | 562636                | 462217                        | N.A.                                     | N.A.                 | N.A.                    |
|    | SPF10-2   | IGH-FR2                    | 652402                | 464929                        | N.A.                                     | N.A.                 | N.A.                    |
